# Supplementary material for: Microbiota dysbiosis influences immune system and muscle pathophysiology of dystrophin‐deficient mice
Source: PubMed Central journal article supplement (PMC9994487; doi:10.15252/emmm.202216244), 2022-12-19
Supplement: EMMM-15-e16244-s014.pdf [file EMMM-15-e16244-s014.pdf]

**Table of content**  
**Appendix Table S1:** Table with the exact p-values in Manuscript

| Figure           | Experiment                                                         | Animal models                                   | p-value                             |
|------------------|--------------------------------------------------------------------|-------------------------------------------------|-------------------------------------|
| <b>Figure 1C</b> | Mucus layer thickness                                              | 3m C5Bl vs 3m mdx                               | <0,0001                             |
|                  | Crypt length                                                       | 3m C5Bl vs 3m mdx                               | <0,0001                             |
| <b>Figure 1E</b> | Lyso PC 18:0 vs. Lyso PC 16:0                                      |                                                 | 0,0015                              |
|                  | Lyso PC 18:0 vs. PC 34:2                                           |                                                 | <0,0001                             |
|                  | Lyso PC 18:0 vs. PC 36:2                                           |                                                 | <0,0001                             |
|                  | Lyso PC 16:0 vs. PC 34:2                                           |                                                 | 0,0003                              |
|                  | Phosphatidylcholines (PC) and<br>Lysophosphatidylcholines (LysoPC) | Lyso PC 16:0 vs. PC 36:2<br>PC 34:2 vs. PC 36:2 |                                     |
| <b>Figure 1F</b> | WB analysis of colon                                               | PSMB8                                           | 3m C5Bl vs 3m mdx<br>0,0089         |
|                  |                                                                    | RelB                                            | 3m C5Bl vs 3m mdx<br>0,0071         |
|                  |                                                                    | PTX3                                            | 3m C5Bl vs 3m mdx<br>0,0168         |
|                  |                                                                    | TLR2                                            | 3m C5Bl vs 3m mdx<br>0,0012         |
| <b>Figure 3B</b> | Predicted gene content                                             | propionyl-CoA:succinate CoA transferase         | 3m C5Bl vs 3m mdx<br>0,0062         |
|                  |                                                                    | propionate CoA-transferase                      | 3m C5Bl vs 3m mdx<br>0,0006         |
|                  |                                                                    | butyryl-CoA:acetate CoA-transferase             | 3m C5Bl vs 3m mdx<br>0,0005         |
| <b>Figure 4E</b> | Total SCFA                                                         | 3m mdx vs 3m mdx+ABX                            | 0,0001                              |
|                  | Acid acetic                                                        | 3m mdx vs 3m mdx+ABX                            | 0,0027                              |
| <b>Figure 5B</b> | % of splenic CD4+ T-cells                                          | Effector                                        | 3m C57Bl vs. 3m mdx<br>0,043        |
|                  |                                                                    |                                                 | 3m C57Bl vs. 3m mdx + ABX<br>0,0324 |
| <b>Figure 5D</b> | % of muscle CD4+ T-cells                                           | Effector                                        | 3m C57Bl vs. 3m mdx<br>0,0024       |
|                  |                                                                    |                                                 | 3m C57Bl vs. 3m mdx + ABX<br>0,0381 |
| <b>Figure 5F</b> | % of splenic lymphocytes                                           | Tregs                                           | 3m mdx vs. 3m mdx + ABX<br>0,0054   |

|                  |                                 |              |                           |         |
|------------------|---------------------------------|--------------|---------------------------|---------|
|                  |                                 | CD4+ T-cells | 3m C57Bl vs. 3m mdx       | 0,0181  |
|                  |                                 |              | 3m C57Bl vs. 3m mdx + ABX | <0,0001 |
|                  |                                 |              | 3m mdx vs. 3m mdx + ABX   | <0,0001 |
|                  |                                 | CD8+ T-cells | 3m C57Bl vs. 3m mdx + ABX | 0,0019  |
|                  |                                 |              | 3m mdx vs. 3m mdx + ABX   | 0,0001  |
| <b>Figure 5G</b> | % of CD45+ cells                |              | 3m C57Bl vs. 3m mdx       | 0,0111  |
|                  |                                 |              | 3m C57Bl vs. 3m mdx + ABX | 0,9258  |
|                  |                                 |              | 3m mdx vs. 3m mdx + ABX   | 0,0073  |
| <b>Figure 5I</b> | % of CD3+ cells/mm <sup>2</sup> |              | 3m C57Bl vs. 3m mdx       | 0,0007  |
| <b>Figure 6D</b> | RT-qPCR experiments             | pax7         | 3m mdx vs. 3m GFmdx       | 0,0053  |
|                  |                                 | myf5         | 3m mdx vs. 3m mdx + ABX   | 0,0086  |
|                  |                                 | actn3        | C57Bl vs. 3m mdx + ABX    | 0,0015  |
|                  |                                 |              | 3m mdx + ABX vs. 3m GFmdx | 0,0143  |
|                  |                                 | myod         | C57Bl vs. 3m mdx          | 0,0273  |
|                  |                                 |              | 3m mdx vs. 3m mdx + ABX   | 0,0046  |
|                  |                                 |              | 3m mdx vs. 3m GFmdx       | 0,0247  |
|                  |                                 | myogenin     | C57Bl vs. 3m GFmdx        | 0,0012  |
|                  |                                 | mrf4         | C57Bl vs. 3m GFmdx        | 0,0075  |
|                  |                                 | murf1        | C57Bl vs. 3m mdx          | 0,0086  |
|                  |                                 |              | C57Bl vs. 3m mdx + ABX    | 0,0253  |
|                  |                                 |              | C57Bl vs. 3m GFmdx        | 0,0002  |
|                  |                                 | tnnt1        | 3m mdx vs. 3m GFmdx       | 0,0143  |
| <b>Figure 6E</b> | Myofiber area                   |              | 3m c57bl vs. 3m mdx       | <0,0001 |

|                  |                     |            |                           |         |
|------------------|---------------------|------------|---------------------------|---------|
|                  |                     |            | 3m c57bl vs. 3m mdx + ABX | <0,0001 |
|                  |                     |            | 3m c57bl vs. 3m GFmdx     | <0,0001 |
|                  |                     |            | 3m mdx vs. 3m mdx + ABX   | <0,0001 |
|                  |                     |            | 3m mdx vs. 3m GFmdx       | <0,0001 |
|                  |                     |            | 3m mdx + ABX vs. 3m GFmdx | <0,0001 |
| <b>Figure 6F</b> | % of fibrosis       |            | 3m c57bl vs. 3m mdx       | <0,0001 |
|                  |                     |            | 3m c57bl vs. 3m mdx + ABX | <0,0001 |
|                  |                     |            | 3m c57bl vs. 3m GFmdx     | <0,0001 |
|                  |                     |            | 3m mdx vs. 3m mdx + ABX   | <0,0001 |
|                  |                     |            | 3m mdx vs. 3m GFmdx       | 0,0204  |
|                  |                     |            | 3m mdx + ABX vs. 3m GFmdx | <0,0001 |
| <b>Figure 6H</b> | Myosin isoform      | IIA Fibers | 3m C57Bl vs. 3m mdx       | 0,0029  |
|                  |                     |            | 3m C57Bl vs. 3m GFmdx     | 0,0067  |
|                  |                     |            | 3m mdx vs. 3m mdx + ABX   | 0,0094  |
|                  |                     |            | 3m mdx + ABX vs. 3m GFmdx | 0,0213  |
|                  |                     | IIB Fibers | 3m C57Bl vs. 3m mdx + ABX | 0,0094  |
|                  |                     |            | 3m mdx vs. 3m mdx + ABX   | <0,0001 |
|                  |                     |            | 3m mdx vs. 3m GFmdx       | 0,0844  |
|                  |                     | IIX Fibers | 3m mdx vs. 3m mdx + ABX   | 0,0143  |
|                  |                     | I Fibers   | 3m C57Bl vs. 3m GFmdx     | 0,011   |
|                  |                     |            | 3m mdx + ABX vs. 3m GFmdx | 0,0293  |
| <b>Figure 6I</b> | Myosin isoform area | IIA Fibers | 3mC57Bl vs. 3m mdx + ABX  | 0,0005  |
|                  |                     |            | 3mC57Bl vs. 3m GFmdx      | <0,0001 |
|                  |                     |            | 3m mdx vs. 3m mdx + ABX   | 0,0032  |
|                  |                     |            | 3m mdx vs. 3m GFmdx       | <0,0001 |
|                  |                     |            | 3m mdx + ABX vs. 3m GFmdx | <0,0001 |
|                  |                     | IIB Fibers | 3mC57Bl vs. 3m GFmdx      | <0,0001 |
|                  |                     |            | 3m mdx vs. 3m GFmdx       | 0,0074  |
|                  |                     |            | 3m mdx + ABX vs. 3m GFmdx | 0,0001  |

|                  |                          |                    |                                |         |
|------------------|--------------------------|--------------------|--------------------------------|---------|
|                  |                          | IIX Fibers         | 3m mdx vs. 3m mdx + ABX        | <0,0001 |
|                  |                          |                    | 3m mdx vs. 3mC57Bl             | 0,0001  |
|                  |                          |                    | 3m mdx + ABX vs. 3m GFmdx      | <0,0001 |
|                  |                          |                    | 3m mdx + ABX vs. 3mC57Bl       | 0,0049  |
|                  |                          |                    | 3m GFmdx vs. 3mC57Bl           | 0,0002  |
| <b>Figure 6J</b> | SDH+ myofiber            |                    | 3m C57Bl vs. mdx 3m+ABX SDH+   | 0,0009  |
|                  |                          |                    | GFM3m SDH+ vs. mdx 3m+ABX SDH+ | 0,0001  |
| <b>Figure 6K</b> | Tetanic force            |                    | 3m mdx vs. 3m mdx + ABX        | <0,0001 |
|                  |                          |                    | 3m mdx vs. 3m GFmdx            | <0,0001 |
|                  |                          |                    | 3m mdx + ABX vs. 3m GFmdx      | <0,0001 |
| <b>Figure 6L</b> | Serum analysis           | ALT                | 3m C57Bl vs. 3m mdx            | 0,0019  |
|                  |                          |                    | 3m C57Bl vs. 3m GFmdx          | 0,0001  |
|                  |                          |                    | 3m mdx + ABX vs. 3m GFmdx      | 0,0201  |
|                  |                          | AST                | 3m C57Bl vs. 3m GFMmdx         | <0,0001 |
|                  |                          |                    | 3m mdx vs. 3m GFMmdx           | 0,0472  |
|                  |                          | CPK                | 3m C57Bl vs. 3m GFMmdx         | <0,0001 |
|                  |                          |                    | 3m mdx + ABX vs. 3m GFMmdx     | 0,003   |
| <b>Figure 7A</b> | FACS on intestinal cells | CD3+               | 3m mdx vs. 3m mdx + ABX        | 0,0044  |
|                  |                          | CD4+CD69+          | 3m mdx vs. 3m mdx + ABX        | 0,0058  |
|                  |                          | CD8+IFN $\gamma$ + | 3m mdx vs. 3m mdx + ABX        | 0,0028  |
|                  |                          | CD4+CD69+Ki67+     | 3m mdx vs. 3m mdx + ABX        | 0,019   |
|                  |                          | CD4+IL10+          | 3m C57Bl vs. 3m mdx            | 0,0022  |
|                  |                          | CD4+IFN $\gamma$ + | 3m C57Bl vs. 3m mdx            | 0,0214  |
|                  |                          |                    | 3m mdx vs. 3m mdx + ABX        | 0,0399  |

|                                        |                                        |                 |                                        |         |
|----------------------------------------|----------------------------------------|-----------------|----------------------------------------|---------|
| Figure 7B                              | FACS on spleen cells                   | CD155+Ly6C      | 3m mdx vs. 3m mdx + ABX                | 0,0435  |
|                                        |                                        | F4/80           | C57Bl vs. mdx                          | 0,0002  |
|                                        |                                        |                 | C57Bl vs. ABX-mdx <sup>FTM_C57Bl</sup> | 0,0126  |
|                                        |                                        |                 | mdx vs. ABX-mdx <sup>FTM_C57Bl</sup>   | 0,0026  |
|                                        |                                        | CD4+CD44-CD62L+ | C57Bl vs. mdx                          | 0,0013  |
|                                        |                                        |                 | C57Bl vs. ABX-mdx <sup>FTM_C57Bl</sup> | 0,0124  |
|                                        |                                        |                 | mdx vs. ABX-mdx <sup>FTM_C57Bl</sup>   | 0,0119  |
|                                        |                                        | CD4+CD44+CD62L- | C57Bl vs. mdx                          | 0,0012  |
|                                        |                                        |                 | mdx vs. ABX-mdx <sup>FTM_C57Bl</sup>   | 0,0102  |
|                                        |                                        | CD8+CD44+CD62L- | C57Bl vs. mdx                          | 0,0106  |
| C57Bl vs. ABX-mdx <sup>FTM_C57Bl</sup> | 0,0122                                 |                 |                                        |         |
| mdx vs. ABX-mdx <sup>FTM_C57Bl</sup>   | 0,0002                                 |                 |                                        |         |
| CCR9+                                  | C57Bl vs. mdx                          | <0,0001         |                                        |         |
|                                        | C57Bl vs. ABX-mdx <sup>FTM_C57Bl</sup> | 0,0106          |                                        |         |
|                                        | mdx vs. ABX-mdx <sup>FTM_C57Bl</sup>   | 0,0024          |                                        |         |
| CD4+GITR+                              | C57Bl vs. mdx                          | 0,0017          |                                        |         |
|                                        | mdx vs. ABX-mdx <sup>FTM_C57Bl</sup>   | 0,0022          |                                        |         |
| Figure 7C                              | FACS on muscle cells                   | CD4+            | C57Bl vs. mdx                          | 0,0228  |
|                                        |                                        |                 | C57Bl vs. ABX-mdx <sup>FTM_C57Bl</sup> | 0,0019  |
|                                        |                                        | CD8+            | C57Bl vs. mdx                          | 0,0097  |
|                                        |                                        |                 | C57Bl vs. ABX-mdx <sup>FTM_C57Bl</sup> | 0,0013  |
| Figure 7D                              | Myofibers area                         |                 | C57Bl vs. mdx                          | <0,0001 |
|                                        |                                        |                 | C57Bl vs. ABX-mdx <sup>FTM_C57Bl</sup> | <0,0001 |
|                                        |                                        |                 | mdx vs. ABX-mdx <sup>FTM_C57Bl</sup>   | <0,0001 |
| Figure 7F                              | Serum analysis                         | ALT             | 3m C57Bl vs. mdx                       | 0,0091  |
|                                        |                                        |                 | 3m C57Bl vs. mdxFTM                    | <0,0001 |
|                                        |                                        |                 | mdx vs. mdxFTM                         | 0,001   |

|                    |                    |                     |                                                           |                              |
|--------------------|--------------------|---------------------|-----------------------------------------------------------|------------------------------|
|                    |                    | CPK                 | 3m C57Bl vs. mdx<br>3m C57Bl vs. mdxFTM<br>mdx vs. mdxFTM | <0,0001<br>0,0008<br><0,0001 |
| <b>Figure 7G</b>   | Tetanic force      |                     | c57bl vs. mdx<br>c57bl vs. mdxFTM<br>mdx vs. mdxFTM       | <0,0001<br>0,0057<br><0,0001 |
| <b>Figure 7I</b>   | Myosin isoform     | IIA Fibers          | mdx vs. mdxFTM                                            | 0,0027                       |
|                    |                    | IIB Fibers          | mdx vs. mdxFTM                                            | 0,0034                       |
|                    |                    | IIX Fibers          | 3m C57Bl vs. mdxFTM                                       | 0,0056                       |
|                    |                    | I Fibers            | 3m C57Bl vs. mdxFTM                                       | 0,0046                       |
| <b>Figure 7K</b>   | SDH+ myofibers     |                     | 3m C57Bl vs. mdx<br>mdx vs. mdxFTM                        | 0,0023<br>0,0003             |
| <b>Figure 7M</b>   | Endotehlial counts | CD31+ cells         | c57bl vs. mdx<br>c57bl vs. mdxFTM<br>mdx vs. mdxFTM       | 0,0333<br>0,0333<br><0,0001  |
|                    |                    | Isolectin+ cells    | c57bl vs. mdx<br>mdx vs. mdxFTM                           | 0,0069<br><0,0001            |
|                    |                    | $\alpha$ SMA+ cells | c57bl vs. mdxFTM<br>mdx vs. mdxFTM                        | 0,0057<br><0,0001            |
| <b>Figure EV2A</b> | Western Blot       | IL6                 | c57bl vs. mdx+ABX<br>c57bl vs. GFmdx<br>mdx vs. mdx+ABX   | 0,0157<br>0,0095<br>0,0496   |
|                    |                    | MMP9                | c57bl vs. mdx+ABX<br>c57bl vs. GFmdx                      | 0,0279<br>0,0205             |
|                    |                    | NF-kB               | c57bl vs. mdx                                             | 0,0433                       |

|                    |              |                |                           |         |
|--------------------|--------------|----------------|---------------------------|---------|
|                    |              |                | mdx vs. mdx+ABX           | 0,0168  |
|                    |              |                | mdx vs. GFmdx             | 0,0249  |
|                    |              | RelB           | c57bl vs. mdx             | 0,0442  |
|                    |              |                | mdx vs. GFmdx             | 0,0191  |
| <b>Figure EV2B</b> | Western Blot | IRS-1          | c57bl vs. mdx             | 0,0217  |
|                    |              |                | c57bl vs. GFmdx           | 0,0341  |
|                    |              | IGF-2R         | c57bl vs. GFmdx           | 0,0258  |
| <b>Figure EV2C</b> | Western Blot | GHR            | c57bl vs. mdx             | 0,0084  |
|                    |              |                | c57bl vs. GFmdx           | 0,0015  |
|                    |              |                | mdx vs. GFmdx             | 0,0009  |
| <b>Figure EV2C</b> | RT-qPCR      | ldh            | 3m C57Bl vs. 3m mdx       | 0,0434  |
|                    |              | pdh            | 3m C57Bl vs. 3m mdx + ABX | 0,0183  |
|                    |              |                | 3m mdx vs. 3m mdx + ABX   | 0,0024  |
|                    |              | pdk4           | 3m C57Bl vs. 3m GFmdx     | 0,0317  |
|                    |              |                | 3m mdx + ABX vs. 3m GFmdx | <0,0001 |
| <b>Figure EV2E</b> | Western Blot | HDAC1          | c57bl vs. GFmdx           | 0,0011  |
|                    |              |                | mdx vs. GFmdx             | 0,0002  |
|                    |              |                | mdx+ABX vs. GFmdx         | <0,0001 |
|                    |              | AKT 1/2/3      | c57bl vs. mdx             | 0,0006  |
|                    |              |                | c57bl vs. GFmdx           | 0,006   |
|                    |              |                | mdx vs. GFmdx             | 0,0144  |
|                    |              | PPAR- $\gamma$ | c57bl vs. GFmdx           | 0,0133  |
|                    |              | AMPK1 $\alpha$ | mdx vs. mdx+ABX           | 0,0005  |
|                    |              |                | mdx vs. GFmdx             | 0,022   |
|                    |              | pSMAD2/3/SMAD3 | mdx vs. GFmdx             | 0,0047  |
|                    |              | PGC-1 $\alpha$ | c57bl vs. mdx             | 0,0082  |

|                    |                          |                      |                               |        |
|--------------------|--------------------------|----------------------|-------------------------------|--------|
|                    |                          |                      | c57bl vs. mdx+ABX             | 0,022  |
|                    |                          |                      | mdx vs. GFmdx                 | 0,0214 |
| <b>Figure EV2F</b> | Western Blot             | TOMM20               | c57bl vs. mdx                 | 0,0001 |
|                    |                          |                      | mdx vs. mdx+ABX               | 0,0098 |
|                    |                          | COXIV                | c57bl vs. GFmdx               | 0,0294 |
| <b>Figure EV2G</b> | RT-qPCR                  | cox5a                | 3m mdx + ABX vs. 3m GFmdx     | 0,0133 |
|                    |                          | cox7b                | 3m C57Bl vs. 3m mdx + ABX     | 0,0215 |
| <b>Figure EV2H</b> | Western Blot             | TRPC1                | c57bl vs. mdx                 | 0,0035 |
|                    |                          |                      | c57bl vs. mdx+ABX             | 0,0036 |
|                    |                          |                      | c57bl vs. GFmdx               | 0,0253 |
|                    |                          | SIRT-1               | mdx vs. GFmdx                 | 0,0151 |
| <b>Figure EV2I</b> | RT-qPCR                  | casq                 | 3m C57Bl vs. 3m GFmdx         | 0,0007 |
|                    |                          |                      | 3m mdx vs. 3m GFmdx           | 0,0231 |
| <b>Figure EV2J</b> | Western Blot             | P62                  | 3m C57Bl vs. 3m mdx           | 0,0412 |
|                    |                          | FOXO1                | c57bl vs. mdx                 | 0,0154 |
|                    |                          |                      | mdx vs. GFmdx                 | 0,0281 |
| <b>Figure EV2K</b> | RT-qPCR                  | chra                 | 3m C57Bl vs. 3m mdx           | 0,0169 |
|                    |                          | chrd                 | 3m C57Bl vs. 3m GFmdx         | 0,0062 |
|                    |                          |                      | 3m mdx vs. 3m GFmdx           | 0,0001 |
|                    |                          |                      | 3m mdx + ABX vs. 3m GFmdx     | 0,0328 |
| <b>Figure EV4A</b> | FACS on intestinal cells | CD8+CD69+ cells      | 3m C57Bl vs. 3m mdx           | 0,042  |
|                    |                          | CD4+IL10+IL17+ cells | 3m C57Bl vs. ABX-mdxFTM_C57Bl | 0,0077 |
|                    |                          | CD4+CD62L+ cells     | 3m C57Bl vs. 3m mdx           | 0,0249 |
|                    |                          |                      | 3m C57Bl vs. ABX-mdxFTM_C57Bl | 0,0198 |



|                    |                      |                                        |                                        |         |
|--------------------|----------------------|----------------------------------------|----------------------------------------|---------|
| <b>Figure EV4B</b> | FACS on spleen cells | Ly6G+ live cells                       | C57Bl vs. mdx                          | <0,0001 |
|                    |                      |                                        | C57Bl vs. ABX-mdx <sup>FTM_C57Bl</sup> | 0,0214  |
|                    |                      | CD11b+ live cells                      | C57Bl vs. mdx                          | 0,0047  |
|                    |                      |                                        | C57Bl vs. ABX-mdx <sup>FTM_C57Bl</sup> | 0,0175  |
|                    |                      | CD44+CD62L+CD4+                        | C57Bl vs. mdx                          | 0,0193  |
|                    |                      |                                        | C57Bl vs. ABX-mdx <sup>FTM_C57Bl</sup> | 0,0001  |
| <b>Figure EV4C</b> | FACS on muscle cells | Granulocytes                           | C57Bl vs. mdx                          | 0,0497  |
|                    |                      | Monocytes                              | C57Bl vs. ABX-mdx <sup>FTM_C57Bl</sup> | 0,0173  |
|                    |                      | CD115-Ly6C+ cells                      | C57Bl vs. mdx                          | 0,0399  |
|                    |                      |                                        | C57Bl vs. ABX-mdx <sup>FTM_C57Bl</sup> | 0,0112  |
|                    |                      | Macrophages                            | C57Bl vs. mdx                          | 0,0241  |
|                    |                      | C57Bl vs. ABX-mdx <sup>FTM_C57Bl</sup> | 0,0151                                 |         |
| <b>Figure EV4D</b> | Serum analysis       | AST                                    | 3m C57Bl vs. mdx                       | 0,0008  |
|                    |                      |                                        | 3m C57Bl vs. mdx <sup>FTM</sup>        | <0,0001 |
|                    |                      | GLUC-3                                 | 3m C57Bl vs. mdx                       | 0,0167  |
|                    |                      |                                        | 3m C57Bl vs. mdx <sup>FTM</sup>        | 0,0009  |
